# Supplementary material for: Long non-coding RNA OIP5-AS1 promotes the progression of esophageal cancer by regulating miR-30a/VOPP1 expression
Source: PubMed Central journal article supplement — Oncol Lett. 2021 Jul 9;22(3):651. doi: 10.3892/ol.2021.12912 (PMC8299025; doi:10.3892/ol.2021.12912), 2021-07-09
Supplement: Supplementary_Data.pdf [file Supplementary_Data.pdf]

Table SI. Clinicopathological data of patients with esophageal cancer (n=32).

| Variables            | N  | OIP5-AS1 expression |             | P-value            |
|----------------------|----|---------------------|-------------|--------------------|
|                      |    | Low (n=13)          | High (n=19) |                    |
| Sex                  |    |                     |             | 0.952 <sup>a</sup> |
| Male                 | 17 | 6                   | 11          |                    |
| Female               | 15 | 7                   | 8           |                    |
| Age, years           |    |                     |             | 0.826 <sup>a</sup> |
| ≤60                  | 14 | 7                   | 7           |                    |
| >60                  | 18 | 6                   | 12          |                    |
| Differentiation      |    |                     |             | 0.037 <sup>b</sup> |
| Well or moderate     | 20 | 8                   | 12          |                    |
| Poor                 | 12 | 5                   | 7           |                    |
| Tumor invasion depth |    |                     |             | 0.028 <sup>a</sup> |
| T1/T2                | 19 | 11                  | 8           |                    |
| T3/T4                | 13 | 2                   | 11          |                    |
| Lymphatic metastasis |    |                     |             | 0.069 <sup>a</sup> |
| No                   | 19 | 8                   | 11          |                    |
| Yes                  | 13 | 5                   | 8           |                    |
| Histological grade   |    |                     |             | 0.048 <sup>b</sup> |
| G1                   | 21 | 12                  | 9           |                    |
| G2/G3                | 11 | 1                   | 10          |                    |

P-values were calculated using <sup>a</sup>Pearson's  $\chi^2$  test or <sup>b</sup>Fisher's exact test. OIP5-AS1, opa-interacting protein 5 antisense transcript 1.
